# Supplementary material for: Descending locus coeruleus noradrenergic signaling to spinal astrocyte subset is required for stress-induced mechanical pain hypersensitivity
Source: eLife. 2026 Mar 9;14:RP104453. doi: 10.7554/eLife.104453 (PMC12971058; doi:10.7554/eLife.104453)
Supplement: Figure 1—figure supplement 1—source data 1. [file elife-104453-fig1-figsupp1-data1.xlsx]

## Sheet: 1
	No-stress						Stress (15 min)						Stress (30 min)					Stress (1 hr)						Stress (2 hr)
Pre	1.26	1.76	1.13	1.45	1.39	1.53	1.39	1.53	1.08	1.77	1.17	1.53	1.53	1.53	1.32	1.76	1.15	1.53	1.28	2	1.04	1.41	1.53	0.99	1.08	1.77	1.55	1.62	2
Post	1.53	1.64	1.77	1.45	1.13	1.7	1.21	1.53	0.65	1.32	1.4	1.11	0.7	0.76	0.5	0.88	0.69	0.47	0.41	0.78	0.41	0.69	0.95	1.49	0.47	1.32	1.21	1.07	2
