# Supplementary material for: Descending locus coeruleus noradrenergic signaling to spinal astrocyte subset is required for stress-induced mechanical pain hypersensitivity
Source: eLife. 2026 Mar 9;14:RP104453. doi: 10.7554/eLife.104453 (PMC12971058; doi:10.7554/eLife.104453)
Supplement: Figure 1—figure supplement 2—source data 1. [file elife-104453-fig1-figsupp2-data1.xlsx]

## Sheet: 2B
Post-stress (min)	No-stress										Stressed
Pre	16.4	18.9	20.6	15	22.5	33.7	19.4	20.4	28.9	22.8	14.5	22.8	15.2	29.6	24.8	23.5	25.8	26.1	19.1	18.1
0	15	19.6	13.8	12.2	16.1	9.4	17.8	24.6	30.1	16.7	24.1	32.2	36.6	60	37.3	60	18.6	21	45.3	23.2
5	12.3	19.2	12.2	9	21.1	10.7	12.5	19.5	8.4	19.6	21.4	32.5	16.8	45.3	15.3	28	15.7	16.7	58.1	7.2
10	16.7	11.3	15.1	7.7	27.5	13.6	23.7	8.4	10.8	28.3	25	12.1	11.1	44.6	9.9	29.3	7.3	15.2	22	8.8
30	8.9	20	12.8	7.3	28.1	40.3	27.8	30	6.1	10.1	11.5	10.9	12.6	60	12.8	6.3	8.1	26.6	9.1	8.5

## Sheet: 2C
Post-stress (min)	No-stress					Stressed
Pre	37.1	23.8	31.4	31.8	20.5	27.4	33.1	32.6	26.6	21.7
0	33.7	27.9	33.7	32.2	28.4	60	43.2	60	60	53.9
5	42.3	24.8	25.9	25.4	20.5	60	36	46.7	29	30.7
10	29.1	25.1	21.6	29.4	22.1	39.9	34.2	42.7	33.8	24.8
30	28.2	32.5	23.6	26.2	24.3	20.3	19.7	28.5	30.6	23.3

## Sheet: 2E
	Control					FST
Pre	0.906522	1.52689	1.52689	1.52689	1.5351	1.54048	2	1.52689	1.54048	1.54048
Post	0.899098	1.54048	1.52689	2	1.0976	0.899098	0.899098	1.52689	1.54048	1.52689
