# Supplementary material for: Descending locus coeruleus noradrenergic signaling to spinal astrocyte subset is required for stress-induced mechanical pain hypersensitivity
Source: eLife. 2026 Mar 9;14:RP104453. doi: 10.7554/eLife.104453 (PMC12971058; doi:10.7554/eLife.104453)
Supplement: Figure 1—figure supplement 4—source data 1. [file elife-104453-fig1-figsupp4-data1.xlsx]

## Sheet: 4B
			Control			Ablated
			38	64	87	0	0	0	0
