# Supplementary material for: Descending locus coeruleus noradrenergic signaling to spinal astrocyte subset is required for stress-induced mechanical pain hypersensitivity
Source: eLife. 2026 Mar 9;14:RP104453. doi: 10.7554/eLife.104453 (PMC12971058; doi:10.7554/eLife.104453)
Supplement: Figure 1—figure supplement 5—source data 1. [file elife-104453-fig1-figsupp5-data1.xlsx]

## Sheet: 5
				Rotarod test
				Control					Ablated
			Pre	52.78	60	56.95	60	60	60	60	60	60	60
			Post	60	60	60	60	52.94	60	60	60	60	60
				Paw-flick test
				Control					Ablated
			Pre-AAV	4.55	6.8	5.2	4.8	8.25	7.25	6.15	7.2	5.85	6.15
			Pre-PBS or DTX	5.35	7.4	5.55	3.35	4.85	5.55	5.3	4.05	6.05	8.05
			Post-PBS or DTX	4.9	8.25	5.2	5.15	3.5	4.25	4.15	6.1	6.95	6.1
