# Supplementary material for: Descending locus coeruleus noradrenergic signaling to spinal astrocyte subset is required for stress-induced mechanical pain hypersensitivity
Source: eLife. 2026 Mar 9;14:RP104453. doi: 10.7554/eLife.104453 (PMC12971058; doi:10.7554/eLife.104453)
Supplement: Figure 1—source data 1. [file elife-104453-fig1-data1.xlsx]

## Sheet: 1B
	No-stress						Stressed
Pre	1.26	1.76	1.13	1.45	1.39	1.53	1.53	1.28	2	1.04	1.41	1.53
30	1.53	1.64	1.77	1.45	1.13	1.7	0.47	0.41	0.78	0.41	0.69	0.95
60	1.76	1.01	1.77	1.42	1.19	1.76	0.47	0.76	1.11	0.33	0.82	1.53
90	1.76	2	2	1.53	1.19	1.76	0.56	0.82	1.22	0.37	1.14	1.32
120	1.76	1.46	1.76	1.27	1.53	1.53	0.71	1.13	1.4	0.82	1.14	1.08
180	1.54	1.76	1.77	1.17	0.92	2	1.39	1.53	2	1.31	1.21	1.76

## Sheet: 1E
Stress(min)
Before	0.4	0.5	0.3	1.1	0.9	0.4
0-10	4.3	10.9	7.3	4.1	7.3	4.9
10-20	2.3	11.2	5.4	5.9	7.4	6
20-30	3.1	6.7	3.7	3.1	3.5	3.4
30-40	2.3	6.8	3.2	4.3	3.9	3.2
40-50	2.7	1.8	3.3	3.7	1.9	1.9
50-60	2.4	1.3	3.5	2.2	0.9	1.9
After	0	0.2	0	0	0.3	0

## Sheet: 1H
	Control							LC-NA neurons ablated
Pre-AAV	1.56	1.76	1.53	1.26	1.53	1.13	1.53	1.32	1.63	1.77	1.77	1.18	1.3	1.31
Pre-DTX	0.96	1.53	1.53	1.76	1.39	1.53	1.06	1.33	1.77	1.15	1.22	1.54	1.33	1.01
Pre-stress	1.53	1.04	1.53	1.08	1.39	1.33	1.37	1.11	1.39	1.53	1.21	0.91	1.53	1.33
30	0.57	0.67	1.38	1.08	0.82	0.2	0.18	1.21	1.77	1.1	1.03	0.57	2	1.45
60	0.21	0.28	1.19	0.56	1.38	0.21	0.27	1.21	1.11	1.03	0.97	1.55	1.76	1.12
90	0.5	0.2	0.61	0.73	1.4	0.42	0.42	1.77	1.28	0.71	1.54	1.06	1.18	1.07
120	0.81	0.69	1.07	1.27	1.19	0.58	1.54	1.27	1.62	0.67	1.31	1.32	1.32	1.76
180	0.95	0.71	1.17	0.93	1.63	0.97	0.91	1.56	1.63	1.31	1.63	1.31	1.92	1.19

## Sheet: 1K
	Control											LC→SDH-NA neurons ablated
Pre-AAV	1.53	1.53	1.26	1.28	1.53	1.54	1.54	2	1.54	1.53	1.53	1.54	1.02	1.54	1.53	1.53	1.26	1.53	1.13	1.54	1.1	1.53
Pre-DTX	2	0.9	0.52	2	2	0.81	1.26	2	1.02	0.91	0.74	0.56	1.26	0.56	0.56	1.54	0.25	2	2	2	1.53	2
Pre-stress	1.53	0.96	1.53	1.54	1.26	1.53	0.9	2	2	1.53	1.54	1.53	1.07	2	0.75	1.54	1.07	1.07	2	2	2	1.53
30	0.75	0.37	0.24	0.56	0.42	0.56	0.27	0.9	0.63	0.41	0.27	0.96	0.92	0.88	0.71	1.02	0.6	0.74	2	2	2	1.53
60	0.41	0.24	0.3	0.63	0.37	1.54	0.41	0.74	0.37	0.52	0.09	1.26	0.71	1.1	0.37	0.9	0.63	0.9	2	2	2	2
90	1.13	0.9	0.56	1.53	0.54	0.88	0.92	1.53	0.74	0.71	0.25	1.53	1.85	0.63	0.24	0.71	1.53	0.91	2	2	2	2
120	1.26	0.48	0.92	1.54	0.91	1.53	0.96	1.53	1.53	0.58	0.54	1.53	1.23	0.81	0.12	0.91	0.88	1.1	2	2	2	2
180	2	1.54	1.54	1.53	1.28	1.53	1.54	2	1.53	1.54	1.1	2	1.23	1.13	0.9	1.54	1.54	1.07	2	2	2	1.53

## Sheet: 1N
	Control				ChrimsonR
Pre-AAV	1.53	1.53	1.54	1.28	1.53	1.26	2	1.1	1.07
Pre-stim.	1.54	1.26	1.53	1.53	1.85	1.53	1.07	1.26	1.53
30	1.26	1.53	1.53	1.54	0.42	0.56	0.25	0.24	0.56
60	1.53	1.53	1.54	2	0.3	0.41	0.54	1.1	0.37
90	1.53	1.23	1.54	1.54	0.63	2	0.92	2	1.23
120	1.13	1.53	1.26	1.53	2	1.54	1.23	1.54	1.53
180	1.54	1.53	1.53	1.1	1.54	2	1.53	1.53	1.53
