# Supplementary material for: Descending locus coeruleus noradrenergic signaling to spinal astrocyte subset is required for stress-induced mechanical pain hypersensitivity
Source: eLife. 2026 Mar 9;14:RP104453. doi: 10.7554/eLife.104453 (PMC12971058; doi:10.7554/eLife.104453)
Supplement: Figure 2—source data 1. [file elife-104453-fig2-data1.xlsx]

## Sheet: 2C
Stim. duration (s)
1	2.29707	1.59388	2.58757	1.44345
2	2.96333	1.59385	2.66212	2.44629
5	5.49299	2.90343	4.84898	4.37795
10	6.94039	4.50328	7.07903	6.51411
20	8.61905	5.80008	11.2841	10.1145

## Sheet: 2E
Stim. duration (s)
1	17.7429	3.47397	0.832245	3.37947	6.09126	3.33389	3.30771	8.39543	10.6066	1.49565	14.5323	8.67631	6.16872	3.33141	2.377	-1.29936	-1.53285	3.69214	4.5779	-1.5687	17.4496	2.33959	20.3104	12.9535	0.369263	4.03235	2.87574	8.09226	10.252	5.09419	6.01238	-0.1657	9.54592	4.11884	2.36943	0.362513	7.7332	3.07756	8.22603	6.73896	1.6296	10.1023	7.16672	5.13356	-0.33636	8.07255	20.0598	6.88535	12.8752
2	49.613	0.248538	10.127	20.6755	23.1084	6.05263	8.00563	2.45031	4.65411	8.41369	34.8867	8.26257	4.19596	-0.00984	19.6848	5.17674	11.4284	19.0042	3.3702	1.28323	5.61326	19.1291	9.16063	0.440561	3.14794	13.5917	7.80243	2.05466	5.29192	2.57482	5.08688	-2.59755	1.68067	3.22095	4.24166	2.87684	-0.07415	4.33585	3.01546	4.28002	2.0214	3.31181	0.702951	3.96819	2.30565	1.38695	1.29494	13.4617	3.6478
5	55.993	54.1891	58.424	58.187	85.7507	74.5839	49.5557	45.1912	46.3798	59.0137	55.0803	42.483	35.56	34.4109	45.2165	0.251667	20.0912	29.065	3.41641	29.69	64.3458	34.6784	13.2647	16.0696	18.1361	26.5585	5.01348	27.3242	4.33937	5.18486	25.0914	4.35289	7.59728	4.67743	5.78085	3.05867	4.27295	8.13267	6.12872	5.87746	21.6603	2.0843	6.4692	3.56279	2.28061	3.99593	7.95104	3.25963	2.12643
10	80.8205	60.1785	90.1323	68.9925	78.7752	103.426	79.1365	3.47454	9.04672	0.951393	77.4442	79.6635	77.5428	44.3765	91.6315	40.3405	72.9521	66.0332	38.4014	59.3145	91.7257	63.5034	11.7053	41.3603	33.5746	46.5199	23.6446	55.416	-0.57725	0.404066	5.21024	3.75883	43.8982	5.4431	11.1776	0.017676	6.10677	3.16092	6.56074	4.81803	4.17546	16.4556	79.5766	8.64898	5.74597	3.33786	1.65835	11.2764	3.28502
20	67.6798	48.5051	85.892	65.2391	75.6528	82.5686	63.6339	1.36805	11.0251	1.89197	51.253	57.4392	63.1994	65.1292	94.5818	45.3303	95.7164	57.1707	23.9731	47.2059	79.1994	52.3269	55.4601	83.88	48.3748	49.3894	45.3506	53.5359	13.317	3.04207	12.9623	6.33223	93.0977	5.23526	12.6589	2.98173	2.83434	7.5228	1.86346	4.76884	5.95442	6.25481	61.6441	15.3186	1.40033	3.376	1.59144	9.85352	9.24256
[truncated: 84 more columns]

## Sheet: 2F
Control	1.12512	0.432801	0.487493	0.594849	0.819142	0.544963	0.394543	0.434663	0.918928	0.572813	0.444602	0.3595	0.785087	0.486221	0.193655	0.414746	0.659504	0.428087	0.405137	0.442501	0.489194	1.0261	0.552344	0.741188	0.670846	0.659781	0.768778	0.639496	0.310138	0.368075	0.794463	0.277785	0.387246	1.12638	0.587948	0.529505	0.908161	0.707128	0.037366	0.638164	0.464642	0.564086	0.721184	0.890505	1.03857	0.411894	0.825465	-0.03382	1.29186
Silodosin	0.110636	0.022141	-0.06609	0.012807	0.049813	0.009254	-0.02839	-0.00949	0.106693	-0.28866	0.11478	0.048366	0.013914	0.029024	-0.01982	0.016419	0.175889	0.13197	0.080698	-0.10878	0.011075	0.008385	-0.00685	0.088198	0.025247	0.039062	0.103889	0.082425	0.050754	0.054052	0.027814	0.087632	0.122176	0.129162	0.005143	0.009728	-0.02203	-0.01467	0.004696	-0.05047	0.151555	0.001516	-0.0007	-0.03095	-0.0234	-0.03286	-0.00733	0.001056	0.05288
[truncated: 34 more columns]

## Sheet: 2G
Post-stim. (min)	Vehicle					Silodosin
Pre-AAV	1.53	1.53	1.53	0.05	1.54	1.26	1.28	1.54	1.26	1.26	1.53
Pre-stim.	2	1.53	1.54	1.07	1.53	1.53	1.54	1.53	1.53	1.54	1.53
30	0.19	0.6	0.52	0.3	0.3	1.26	1.07	1.07	1.26	1.28	2
60	0.24	1.02	0.48	0.42	0.74	0.75	0.63	1.13	1.54	1.53	2
90	1.02	1.53	0.9	1.23	0.58	1.54	0.88	1.53	0.81	1.85	2
120	1.53	2	0.41	1.54	0.88	1.53	1.54	1.53	0.9	1.02	1.54
180	1.26	1.54	1.54	1.53	2	2	1.26	1.23	1.54	1.26	1.53

## Sheet: 2H
	Control						Hes5+ astrocytes–α1AR cKO
Pre	1.52689	1.54048	1.76344	1.4081	1.39365	2	1.76344	1.76344	1.53369	1.76344	1.4081	1.54048
Post-NA	0.4699	0.65344	0.75024	0.49813	0.57326	0.81225	1.76344	1.76344	1.63021	1.63021	1.39365	1.76344

## Sheet: 2I
Post-stress (min)	Control							Hes5+ astrocytes–α1AR cKO
Pre-TAM	1.39776	1.25462	1.39365	1.77024	1.53369	1.2171	1.26042	1.52689	1.387	1.16561	1.53369	1.68829	1.39365	1.14267	1.39365
Pre-stress	1.53099	1.40541	1.40541	1.23351	1.53369	1.39365	1.4081	1.39365	1.53369	1.40131	1.21299	1.23351	1.53779	1.40045	1.39365
30	1.08347	0.4699	0.36694	0.57326	0.69925	0.52628	0.55433	1.54048	1.12223	0.71112	0.72553	1.26807	1.22901	1.09112	0.85615
60	0.51644	0.33127	0.75679	0.62872	0.79326	0.40566	0.47062	0.89572	0.83389	0.76866	0.99188	1.07926	0.82412	1.5351	1.01298
90	0.75024	0.74598	0.89094	0.75024	1.25462	1.14568	0.81344	0.90652	0.95326	1.17005	1.01298	1.00533	1.40045	1.52689	0.99254
120	1.0976	0.82962	1.40131	1.17326	1.08347	1.3802	0.69925	0.80794	1.27573	1.53099	1.0663	1.21299	0.99835	1.40131	0.87867
180	1.39365	1.14568	1.39365	0.90281	1.4081	0.90016	0.63302	1.3802	1.26807	1.31224	0.74171	0.63079	1.18666	1.26042	1.53099

## Sheet: 2J
Post-stress (min)	Vehicle					DCK
Pre	1.54	1.4	0.9	1.14	2	1.53	1.13	1.76	1.53	1.26
30	0.59	1.14	0.46	0.63	0.7	0.9	1.63	1.77	1.15	1.21
60	0.76	0.89	0.47	0.56	0.63	1.54	1.54	1.54	0.9	1.32
90	0.74	1.22	1.25	0.9	1.11	1	0.96	1.53	1.1	1.22
120	0.95	1.09	1.41	0.91	1.01	1.53	1.77	1.21	1.26	1.39
180	1.76	1.54	1.53	1.09	1.53	1.39	1.53	1.4	1.22	1.53
