# Supplementary material for: Descending locus coeruleus noradrenergic signaling to spinal astrocyte subset is required for stress-induced mechanical pain hypersensitivity
Source: eLife. 2026 Mar 9;14:RP104453. doi: 10.7554/eLife.104453 (PMC12971058; doi:10.7554/eLife.104453)
Supplement: Figure 3—figure supplement 1—source data 1. [file elife-104453-fig3-figsupp1-data1.xlsx]

## Sheet: 1
			Pre	2.28333	3.26667	0.3	1.1	0.166667	0.583333	0.65	0.466667
			CNO	1.78333	2.76667	0.15	1.01667	0.35	0.516667	0.816667	0.55
