# Supplementary material for: Descending locus coeruleus noradrenergic signaling to spinal astrocyte subset is required for stress-induced mechanical pain hypersensitivity
Source: eLife. 2026 Mar 9;14:RP104453. doi: 10.7554/eLife.104453 (PMC12971058; doi:10.7554/eLife.104453)
Supplement: Figure 3—figure supplement 2—source data 1. [file elife-104453-fig3-figsupp2-data1.xlsx]

## Sheet: 2
	Vgat-Cre; sgControl																																						Vgat-Cre; sgAdora1
depolarized?	YES	YES	YES	NO	NO	NO	YES	NO	NO	NO	NO	YES	NO	NO	NO	NO	NO	NO	NO	NO	NO	NO	NO	NO	NO	NO	NO	YES	NO	YES	YES	NO	NO	YES	NO	NO	NO	YES	NO	NO	YES	NO	YES	NO	YES	YES	NO	NO	YES
[truncated: 6 more columns]
