# Supplementary material for: Descending locus coeruleus noradrenergic signaling to spinal astrocyte subset is required for stress-induced mechanical pain hypersensitivity
Source: eLife. 2026 Mar 9;14:RP104453. doi: 10.7554/eLife.104453 (PMC12971058; doi:10.7554/eLife.104453)
Supplement: Figure 3—source data 1. [file elife-104453-fig3-data1.xlsx]

## Sheet: 3A
	Control						Vgat+ INs–α1AR cKO
Pre	1.31	1.63	1.76	1.76	1.53	1.63	2	1.53	1.31	1.53	1.76	1.53
Post-NA	0.57	0.53	0.7	0.39	0.3	0.66	0.58	0.57	0.79	0.61	0.67	0.42

## Sheet: 3B
	Control						Vgat+ INs–α1AR cKO
Pre	1.53	0.98	1.08	1.53	1.53	2	1.76	1.01	1.41	1.3	1.77	1.51
Post-NA	0.5	0.5	0.26	0.4	0.49	0.98	0.71	0.44	0.36	0.63	0.42	0.31

## Sheet: 3C
Post-stress (min)	Control						Vgat+ INs–α1AR cKO
Pre	1.53099	1.23351	0.8991	1.53369	1.00206	1.53779	1.16555	1.07976	1.3843	1.31904	1.31635	0.98495	1.53779	1.76755	1.31904
30	0.44133	0.75024	0.40902	0.49886	0.40974	0.51572	0.51572	0.3632	0.3632	0.7298	0.3632	0.33057	0.3632	0.33127	0.4699
60	0.36694	0.90652	0.29896	0.60657	0.38935	0.33127	0.41317	0.29896	0.33463	0.39551	0.29896	0.40639	0.33127	0.41863	0.33127
90	0.82467	0.75679	0.55788	0.69146	0.40639	0.61332	0.42096	0.36694	0.33057	0.56126	0.33463	0.47062	0.39481	0.29896	0.41863
120	0.88279	1.07884	0.82467	0.69925	0.33463	0.69052	0.79607	0.95252	0.57326	0.75024	0.61254	0.76866	0.4699	0.29561	0.46246
180	1.17684	0.99019	0.63298	0.98495	0.71735	0.82838	0.85986	0.97143	0.62872	1.26042	1.4081	1.09112	0.78172	1.22901	0.90832

## Sheet: 3E
inhibited by CPA?	No	No	Yes	No	No	Yes	No	Yes	Yes	Yes

## Sheet: 3I
	Control										SDH-Vgat+ INs–A1R cKD
inhibited by CPA?	No	No	Yes	No	No	Yes	No	Yes	Yes	Yes	No	No	Yes	No	No	Yes	No	Yes	Yes	Yes

## Sheet: 3L
Pre	0.866667	1.55	1.61667	0.766667	0.583333	0.55	0.8
CNO	0.583333	1.28333	0.366667	0.316667	0.433333	0.383333	0.933333

## Sheet: 3N
Pre	0.933333	1.1	1.25	1.61667	0.683333	1.63333	1.21667	0.55	2.78333	1.38333	1.36667	1.15	1.66667
CNO+CPT	0.9	1.98333	0.683333	0.483333	0.783333	1.05	1.2	0.716667	3.53333	3.43333	3.06667	2.06667	2.23333
