# Supplementary material for: Descending locus coeruleus noradrenergic signaling to spinal astrocyte subset is required for stress-induced mechanical pain hypersensitivity
Source: eLife. 2026 Mar 9;14:RP104453. doi: 10.7554/eLife.104453 (PMC12971058; doi:10.7554/eLife.104453)
Supplement: Figure 4—source data 1. [file elife-104453-fig4-data1.xlsx]

## Sheet: 4A
	Vehicle					CPT
Pre	1.29	1.63	1.39	1.35	1.24	1.38	0.95	1.64	1.22	1.53
Post-NA	0.61	0.64	0.47	0.51	0.44	0.83	1.48	1.56	2	0.97

## Sheet: 4B
	Control									SDH-Vgat+ INs–A1R cKD
Pre	1.47147	1.52689	1.52689	1.54048	1.54048	1.54048	1.54048	2	1.27573	0.8991	1.54048	1.26042	2	1.26042	1.5351	1.26042	1.26042	1.0976
Post-NA	0.51572	0.42408	0.42408	0.51572	0.42408	0.36694	0.30232	0.90652	0.36553	0.90652	0.8991	1.27573	0.88279	0.63079	1.54048	0.74171	0.75024	0.8991

## Sheet: 4C
Post-stress (min)	Vehicle						CPT
Pre	1.54	1.04	1.53	1.38	1.39	1.25	1.13	1.25	1.17	1.76	1.09
30	0.21	0.32	0.59	0.65	0.63	0.41	1.4	1.08	1.4	1.53	1.46
60	0.24	0.13	0.53	0.92	0.98	0.53	1.07	1.77	1.47	1.77	1.64
90	0.41	0.63	0.76	0.54	0.88	0.6	1.49	0.78	1.92	2	1.25
120	0.61	1.26	0.44	0.98	0.52	0.42	0.97	1.2	2	2	1.53
180	1.53	1.76	1.14	1.55	2	1.76	1.77	1.33	1.53	2	1.77

## Sheet: 4D
Post-stress (min)	Control						SDH-Vgat+ INs–A1R cKD
Pre-AAV	1.28	1.28	1.23	1.54	1.53	1.54	1.53	1.53	1.53	1.28	0.81	1.07	1.53
Pre-stress	1.54	1.53	1.07	1.53	1.54	1.53	1.53	1.53	1.1	1.53	1.26	1.53	1.53
30	0.24	0.42	0.3	0.52	1.13	0.48	1.53	1.28	0.96	1.28	1.23	1.02	0.9
60	0.3	0.56	0.37	0.48	1.26	0.71	1.26	1.53	0.6	1.23	0.75	1.53	1.53
90	0.3	0.24	0.42	0.22	0.88	1.1	1.53	1.53	1.53	0.91	0.75	1.28	1.44
120	0.25	1.53	0.71	1.53	1.53	1.28	1.54	1.53	1.28	1.1	0.92	0.88	2
180	1.28	1.26	0.9	1.54	2	1.54	1.53	1.53	0.96	1.53	0.9	1.53	1.23

## Sheet: 4I
Control	2.66667	5.33333	2.33333	4.33333
Aβ stim.	15.3333	6.66667	6.33333	5.33333
Stress	7.33333	5	1.33333	4.33333
Stress+Aβ stim.	19.3333	23.3333	18.3333	15.3333	26
Stress+Aβ stim.+CPT	3.33333	7.66667	4	9	6

## Sheet: 4H
Control	0.33	1.33	0.33	0.67
Aβ stim.	2	0	1.33	0.33
Stress	1	1.33	2	2.33	0.67
Stress+Aβ stim.	4.33	5	3.33	4.33
Stress+Aβ stim.+CPT	1	2.67	1	3.33
