# Supplementary material for: Descending locus coeruleus noradrenergic signaling to spinal astrocyte subset is required for stress-induced mechanical pain hypersensitivity
Source: eLife. 2026 Mar 9;14:RP104453. doi: 10.7554/eLife.104453 (PMC12971058; doi:10.7554/eLife.104453)
Supplement: Supplementary file 1. — Previously reported changes in pain-related behaviors induced by acute restraint stress were summarized along with information on animal species, strain, sex, duration of restraint, and pain tests. [file elife-104453-supp1.xlsx]

## Sheet: Sheet1
Supplementary File 1: Summary of anti- and pro-nociceptive effects of acute restraint stress reported in previously published studies.
Species	Strain	Sex	Restraint duration	Pain test	Pain threshold	Reference (PMID)
Rat	Long–Evans	M	30 min	Formalin	↑	8654532
Rat	Wistar	M	15, 30 min or 1 hour	Formalin	no change	16488452
Mouse	C57BL/6	M,F	30 min	Formalin	↑	27520589
Rat	Wistar	M	3 hour	Formalin	↑	33342008
Mouse	ICR	M	1 hour	Formalin	↑	17113957
Rat	Long Evans	F	15 min	Hot-plate	↑	14499966
Mouse	C57BL/6	M	15, 30 min or 1 hour	Hot-plate	↑	31571215
Rat	Wistar	M	1.5 hour	Hot-plate	↑	31676262
Mouse	C57BL/6	M	30 min	Hot-plate	↑	31915019
Rat	Wistar	M	6 hour	Hot-plate	↑	38483045
Mouse	C57BL/6	M	30 or 60 min	Hot-plate	↑	38922705
Mouse	C57BL/6	M	1 hour	Hot-plate	↑	39337262
Mouse	BALB/c	M	1 hour	Hot-plate, Tail-flick	↑	39831900
Rat	Sprague–Dawley	M	20 min	Paw withdrawal by heat	↑	18822354
Rat	Sprague–Dawley	M	30 min	Plantar test	↑	21195099
Mouse	CD-1	M	30 min	Tail-flick	↑	3233495
Rat	Sprague–Dawley	M	30 min	Tail-flick	↑	7865890
Rat	Wistar	M,F	1 hour	Tail-flick	↑	9523917
Mouse	NMRI	M	30 min or 1, 2 hour	Tail-flick	↑	15219760
Rat	Sprague–Dawley	M	6 hour	Tail-flick	↑	15561392
Rat	Sprague–Dawley	M	90 min	Tail-flick	↑	15936504
Rat	Wistar	M	1 hour	Tail-flick	↑	26852948
Rat	albino Wistat	M	3 hour	Tail-flick	↑	38960330
Rat	albino Wistat	M	3 hour	Tail-flick	↑	39180799
Rat	albino Wistat	M	3 hour	Tail-flick	↑	40194685
Rat	Wistar	M	1 hour	Tail-flick (warm water)	↓	24992900
Mouse	CD-1	M	2 hour	Tail-flick (warm water)	↑	28967123
Mouse	C57BL/6	M	2 hour	Tail-flick (warm water)	↓	38377152
Mouse	Penk-Cre;Rosa-tdTomato	M	2 hour	von Frey	↑	28162807
Mouse	Swiss	M	2 hour	von Frey	↑	32835778
Mouse	C57BL/6	M	2 or 4 hour	von Frey	↓	35118831
Mouse	C57BL/6	M	30 min	von Frey	↑	40781546
Mouse	Swiss	M	4 hour	von Frey, Hot-plate	↓	30114472
